# Supplementary material
Source: publisher figshare collection journal article supplement (https://karger.figshare.com/articles/dataset/_/5121160)
Supplement: Supplementary file 1 [file 1 › 000313359_sm_Figure.pdf]

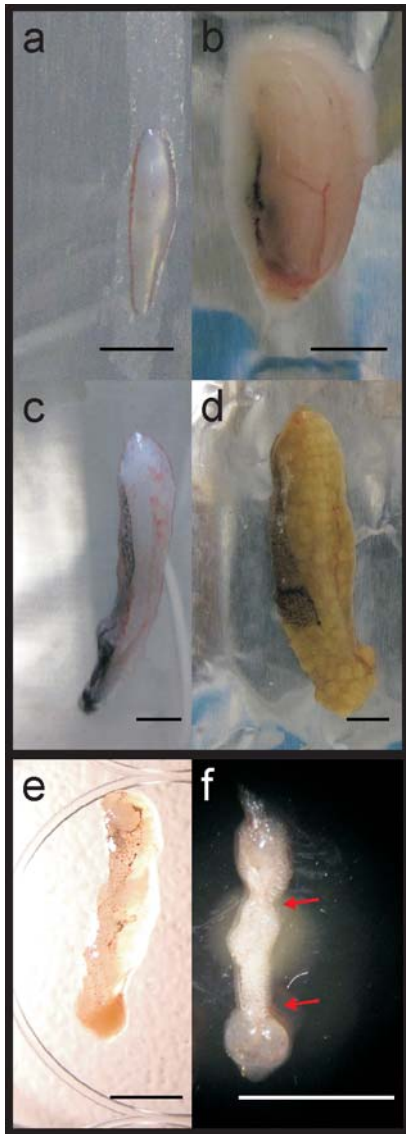

Suppl. Fig. 1. Representative macroscopic morphology of gonads from a immature male, b mature male, c immature female, d mature female; and examples of abnormal gonad morphology: e 2 lobes of distinct tissues in a gonad strand, f 3 lobes delimited by tissue constrictions (red arrows) in a gonad strand. Bars = 0.3 cm.
